# Supplementary material for: Exploring CoP core–shell nanosheets by Fe and Zn dual cation doping as efficient electrocatalysts for overall water splitting
Source: Royal Society of Chemistry journal article supplement (doi:10.1039/c9cy02425e), 2020-01-01
Supplement: c9cy02425e1.pdf [file c9cy02425e1.pdf]

## Supplementary data

### **Exploring CoP core-shell nanosheets by Fe and Zn dual cation doping as efficient electrocatalyst for overall water splitting**

Pengcheng Wang,<sup>1</sup> Xuefeng Liu,<sup>1</sup> Yaotian Yan,<sup>1</sup> Jian Cao,<sup>2</sup> Jicai Feng<sup>1</sup> and Junlei

Qi\*<sup>1</sup>

*1. State Key Laboratory of Advanced Welding and Joining, Harbin Institute of  
Technology, Harbin 150001, China*

*2. School of Materials Science and Engineering, Harbin Institute of Technology,  
Harbin, China*

\*Corresponding authors:

E-mail: jlqi@hit.edu.cn (J.L. Qi)

## 1. Experimental Section

**Fabrication of ZnCo MOF:** The commercial carbon cloth was treated with concentrated HNO<sub>3</sub>, ethanol and deionized water several times, according to previous research.<sup>[1]</sup> Firstly, 1.33 mmol Co(NO<sub>3</sub>)<sub>2</sub>·6H<sub>2</sub>O and 0.67 mmol Zn(NO<sub>3</sub>)<sub>2</sub>·6H<sub>2</sub>O are dissolved in 40 mL deionized water to form a homogeneous solution, followed by adding a deionized water of 1.312 g 2-methylimidazole (40 mL). Then, a piece of clean carbon cloth (2×5 cm<sup>2</sup>) was immersed in the prepared solution for 4h. After that, the obtained sample was washed by deionized water and ethanol for several time, and dried at 60 °C overnight.

**Fabrication of Fe/Zn-Co<sub>3</sub>O<sub>4</sub>:** First, 80 mg FeSO<sub>4</sub>·7H<sub>2</sub>O is dissolved in 10 ml H<sub>2</sub>O to get a homogeneous solution, while adding 10 ml ethanol. Subsequently, a piece of ZnCo MOF is immersed in above solution and aged for 15 min at room temperature. Then, the obtained Fe-ZnCo precursor is washed by deionized water and ethanol, and dried at 60 °C overnight. Finally, the Fe/Zn-Co<sub>3</sub>O<sub>4</sub> is obtained by annealing in air at 450 °C for 2h. Different amounts of FeSO<sub>4</sub>·7H<sub>2</sub>O (20, 50, 80 and 110 mg) are set to obtain various Fe/Zn-Co<sub>3</sub>O<sub>4</sub>, shortly named as Fe/Zn-Co<sub>3</sub>O<sub>4</sub>-20~110. In addition, the Zn-Co<sub>3</sub>O<sub>4</sub> is prepared by directly annealing ZnCo-MOF via similar process.

**Fabrication of Fe/Zn-CoP:** The 0.3 g NaH<sub>2</sub>PO<sub>2</sub> powers are placed on a glass plate placed at upstream, and Fe/Zn-Co<sub>3</sub>O<sub>4</sub> are placed at the downstream of the tube furnace. The furnace is heated to 300 °C at Ar atmosphere with a heating rate of 5 °C min<sup>-1</sup>, and maintained at 300 °C for 2h. Various Fe/Zn-CoP samples are obtained by the same phosphating process, and shortly named as Fe/Zn-CoP-20~110. For comparison, Zn-CoP is obtained by the similar phosphating process.

## 2. Material characterization

The morphologies and chemical constituents of the samples are characterized by

SEM, TEM and EDX. The XRD is used to detect the crystal structure of samples. The chemical constituents of the as-prepared samples were detected by XPS and Raman. The binding energy of obtained samples is calibrated based on the C 1s peak at 284.4 eV. The Brunauer-Emmett-Teller (BET) method is used to evaluate the surface areas of the powders scraped from carbon cloth.

### **3. Electrochemical measurements**

All electrochemical performances were measured in the electrochemical workstation (CHI 760E). The HER and OER properties were measured in a three-electrode system, and the obtained samples, Hg/HgO and graphite rod were used as working electrode, reference electrode and counter electrode, respectively. The polarization curves were measured at  $2 \text{ mV s}^{-1}$ , and then compensated with  $iR$ -correction. Before tests, all samples were cycled at  $20 \text{ mV s}^{-1}$  until the stability of cyclic voltammetry (CV), then the data were collected. The reference electrode of Pt/C (20 wt% Pt) and  $\text{RuO}_2$  are also prepared on carbon cloth, and the prepared method was according to previously reported researches.<sup>[2,3]</sup> The polarization curves of HER and OER are normalized by  $C_{dl}$ , as following:  $\text{ECSA}=(C_{dl-\text{catal.}}-C_{dl-\text{CC}})/C_s$ , where  $C_s$  value of  $0.040 \text{ mF cm}^{-2}$  is adopted.<sup>[4,5]</sup>

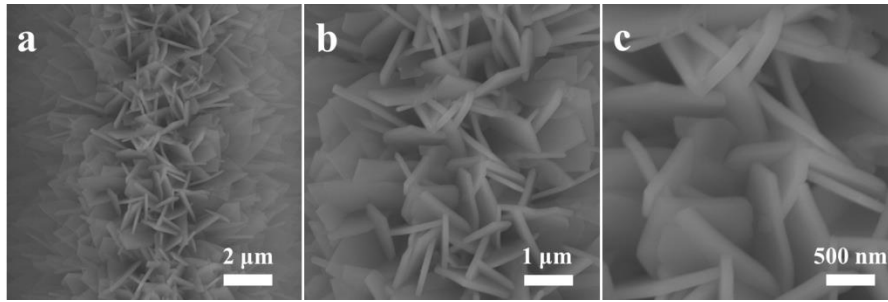

**Fig. S1.** SEM images of ZnCo MOF

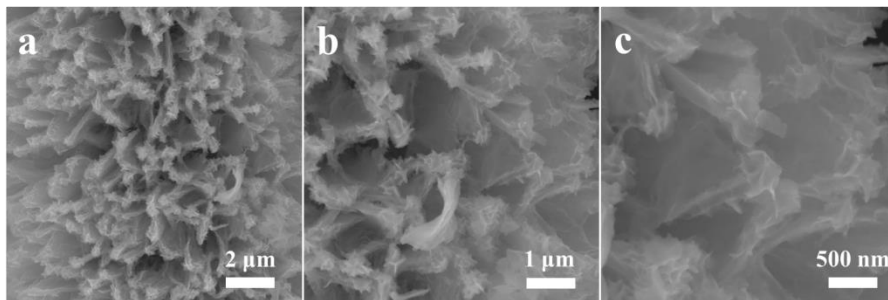

**Fig. S2.** SEM images of Fe/Zn-CO<sub>3</sub>O<sub>4</sub> (The Fe content is 80 mg)

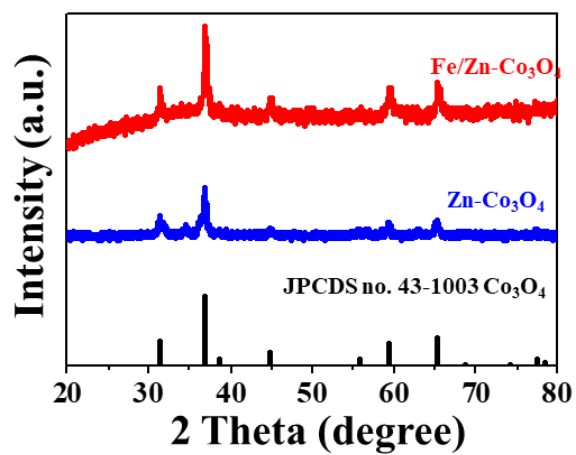

**Fig. S3.** XRD patterns of Fe/Zn-Co<sub>3</sub>O<sub>4</sub> and Zn-Co<sub>3</sub>O<sub>4</sub> (the XRD results were tested by the powder scraped from carbon cloth)

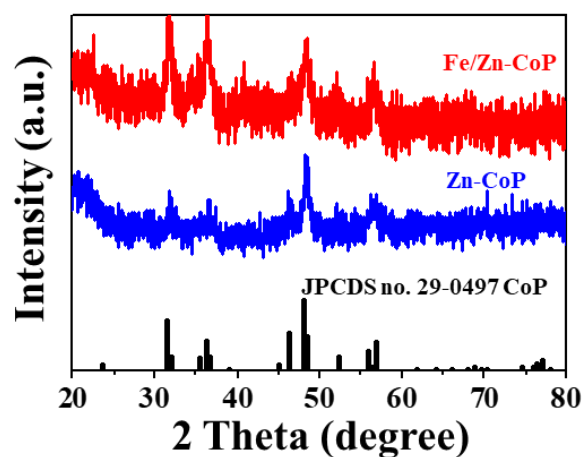

**Fig. S4.** XRD patterns of Fe/Zn-CoP and Zn-CoP (the XRD results were tested by the powder scraped from carbon cloth)

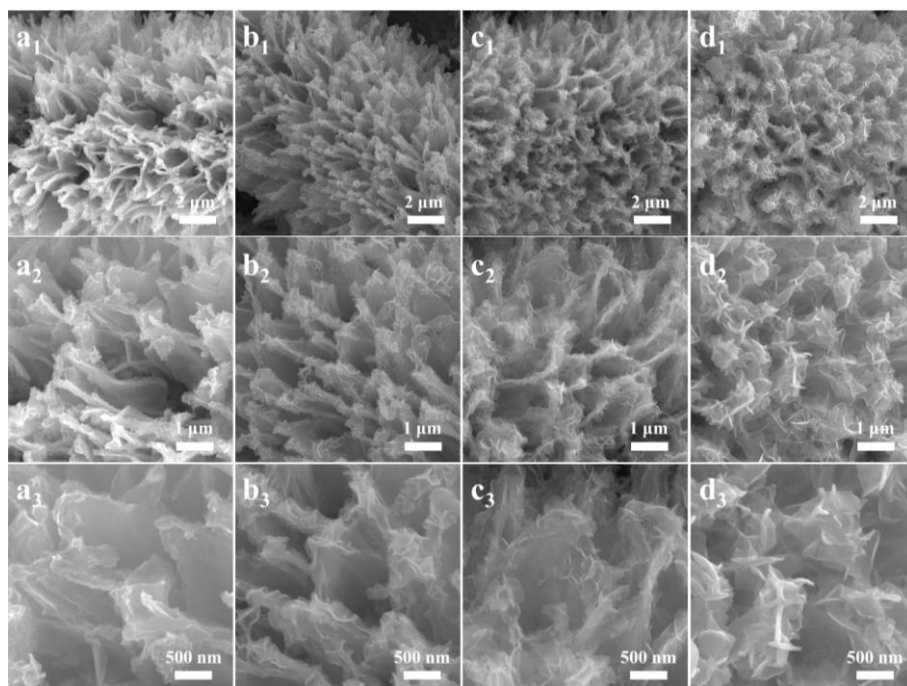

**Fig. S5.** SEM images of Fe/Zn-CoP-20 (a<sub>1</sub>-a<sub>3</sub>), Fe/Zn-CoP-50 (b<sub>1</sub>-b<sub>3</sub>), Fe/Zn-CoP-80 (c<sub>1</sub>-c<sub>3</sub>), and Fe/Zn-CoP-110 (d<sub>1</sub>-d<sub>3</sub>)

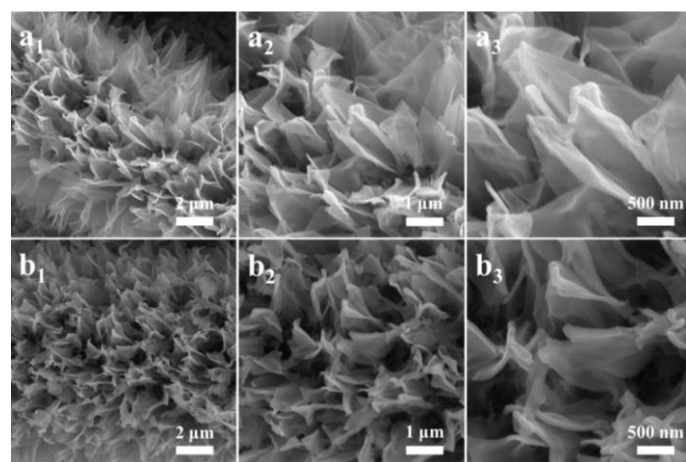

**Fig. S6.** SEM images of Zn-Co<sub>3</sub>O<sub>4</sub> (a<sub>1</sub>-a<sub>3</sub>) and Zn-CoP (b<sub>1</sub>-b<sub>3</sub>)

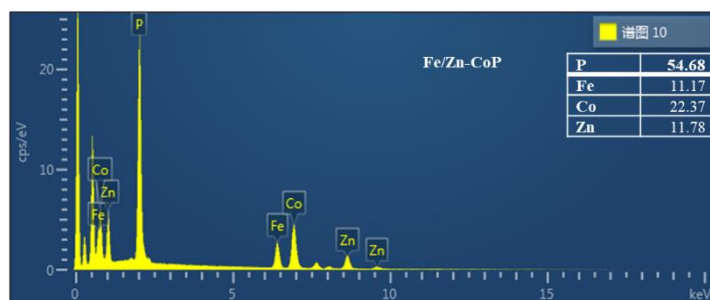

**Fig. S7** EDX spectra of Fe/Zn-CoP

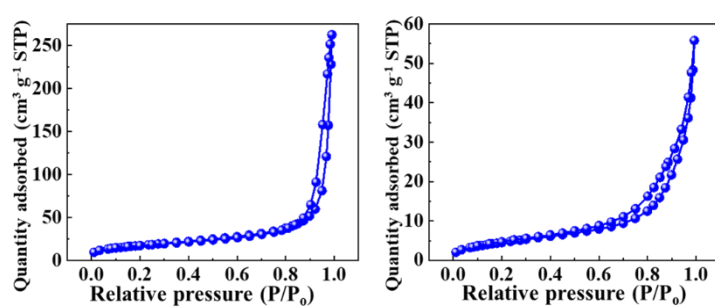

**Fig. S8** BET surface areas of Fe/Zn-CoP and Zn-CoP

**Table S1** EDX results of obtained samples

|    | Fe/Zn-CoP | After HER<br>activation | After OER<br>activation | After HER<br>cycle | After OER<br>cycle |
|----|-----------|-------------------------|-------------------------|--------------------|--------------------|
| P  | 54.68     | 33.79                   | 1.42                    | 37.42              | 2.57               |
| Fe | 11.17     | 23.15                   | 35.94                   | 25.91              | 23.15              |
| Co | 22.37     | 42.54                   | 53.16                   | 36.32              | 68.99              |
| Zn | 11.78     | 0.51                    | 8.47                    | 0.34               | 5.29               |

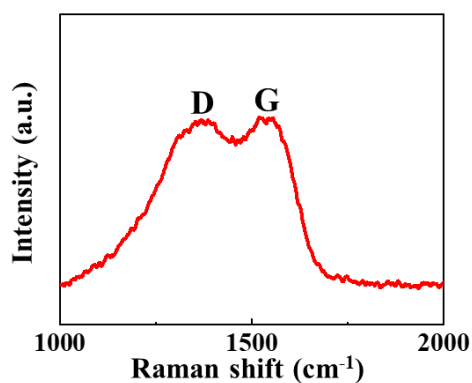

**Fig. S9** Raman spectrum of Fe/Zn-CoP (the result show that the Fe/Zn-CoP is rich in carbon)

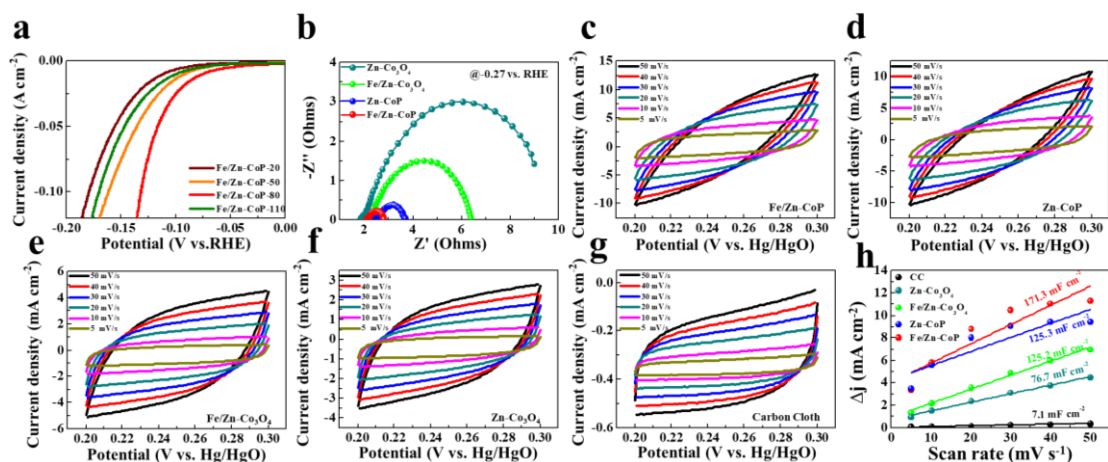

**Fig. S10** (a) HER polarization curves for Fe/Zn-CoP with different conditions. (b) Nyquist plots of obtained samples. (c-g) The CV curves for estimating the ECSA in HER tests. (h)  $C_{dl}$  values of obtained samples.



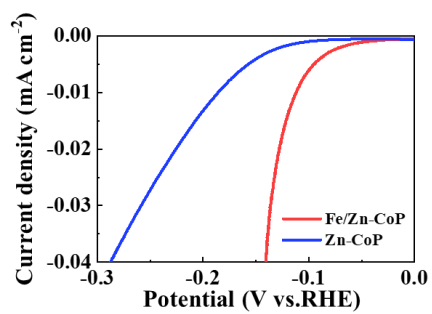

**Fig. S11** HER polarization curves of Fe/Zn-CoP and Zn-CoP normalized by ECSA

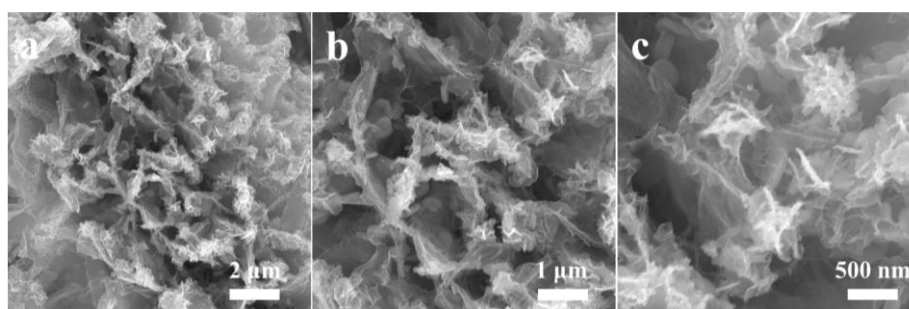

**Fig. S12** SEM images of Fe/Zn-CoP after HER cycle.

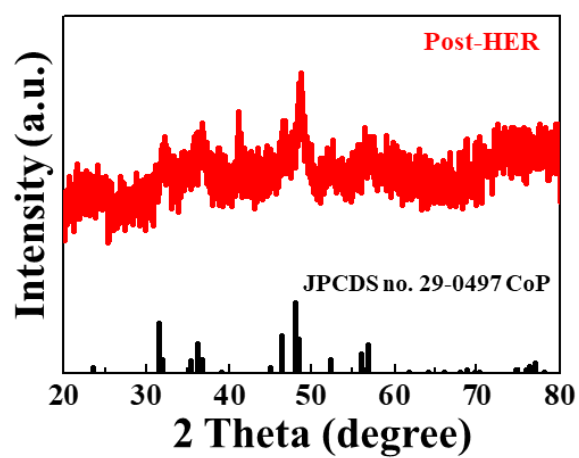

**Fig. S13** XRD pattern of Fe/Zn-CoP after HER cycle.

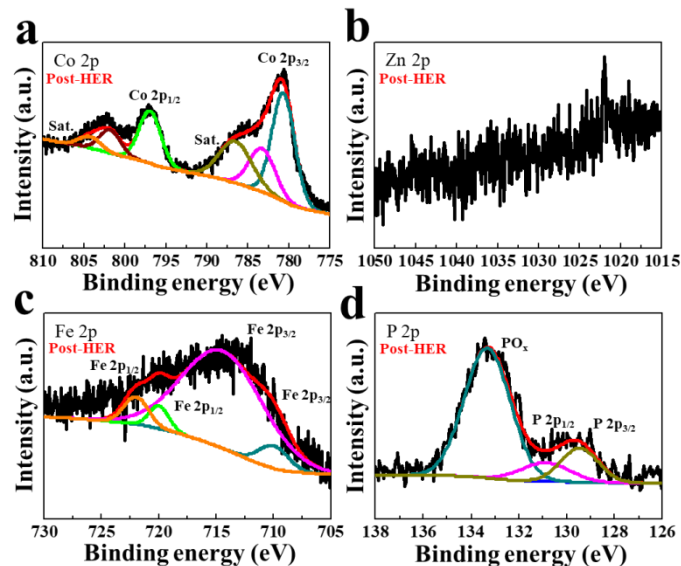

Fig. S14 XPS spectra of Fe/Zn-CoP after HER cycle.

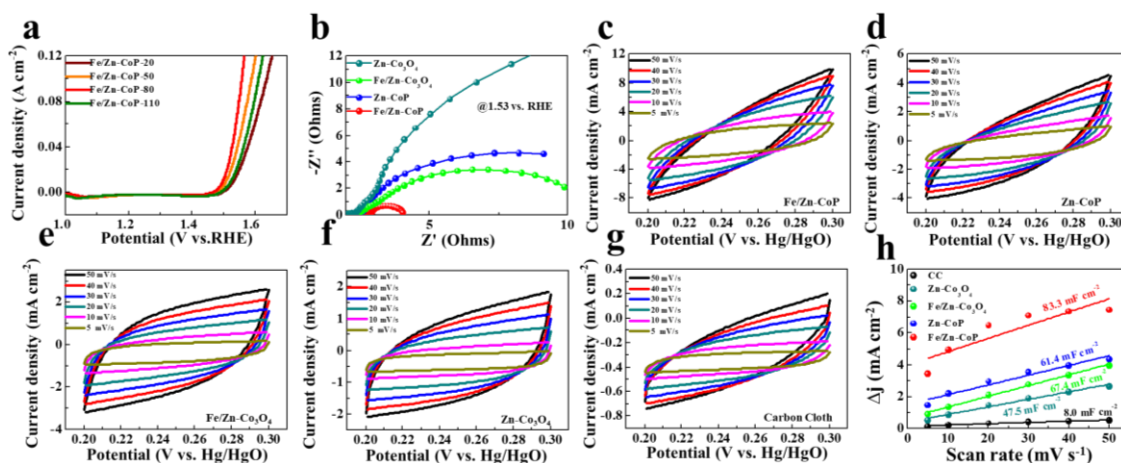

Fig. S15 (a) OER polarization curves for Fe/Zn-CoP with different conditions. (b) Nyquist plots of obtained samples. (c-g) The CV curves for estimating the ECSA in OER tests. (h) C<sub>dl</sub> values of obtained samples.

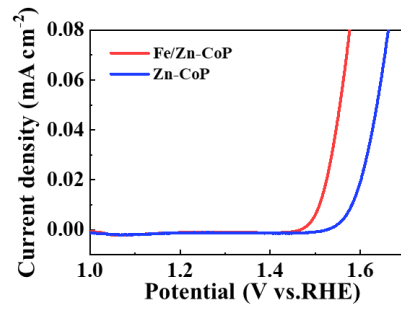

**Fig. S16** OER polarization curves of Fe/Zn-CoP and Zn-CoP normalized by ECSA.

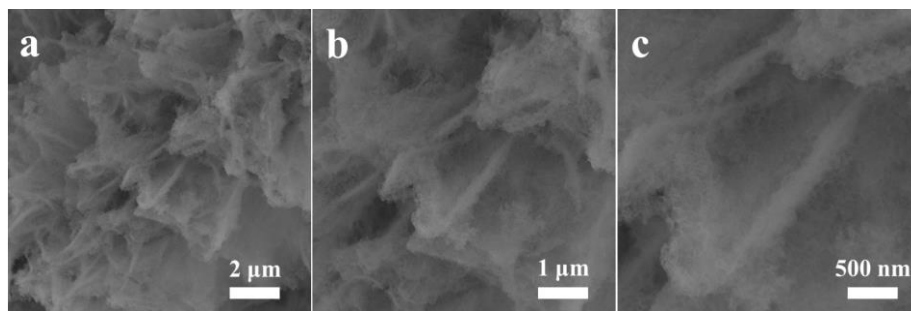

**Fig. S17** SEM images of Fe/Zn-CoP after OER cycle.

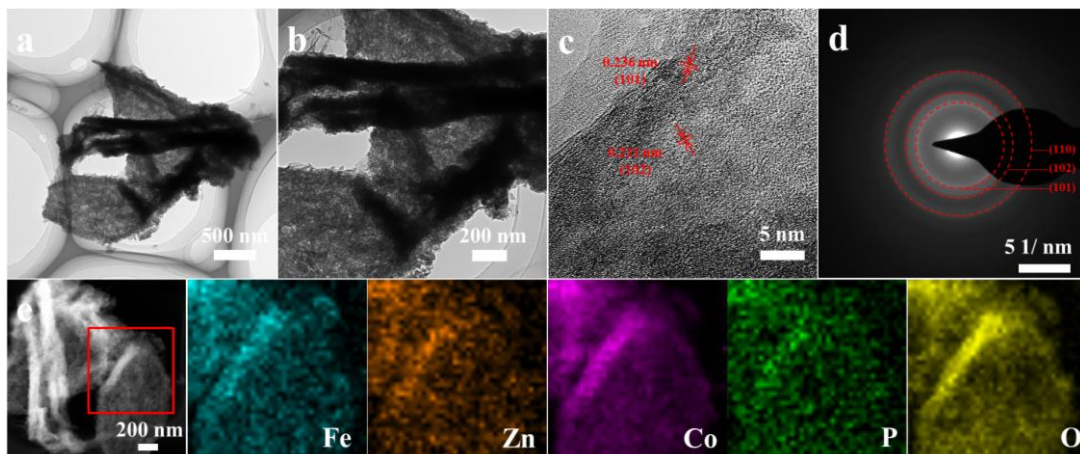

**Fig. S18** (a, b) TEM, (c) HRTEM, (d) corresponding SAED pattern, and (e) elemental mapping images of Fe/Zn-CoP after OER cycle.

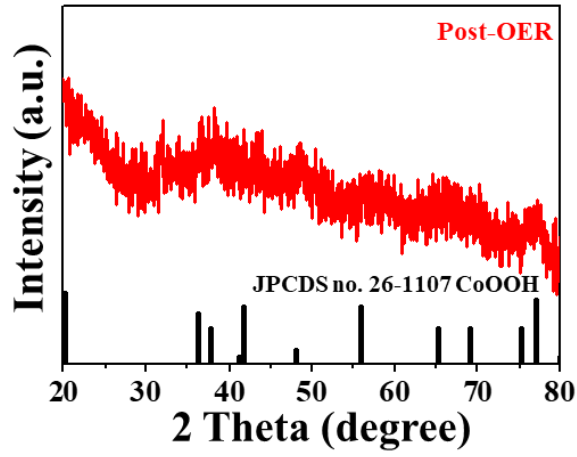

Fig. S19 XRD pattern of Fe/Zn-CoP after OER cycle.

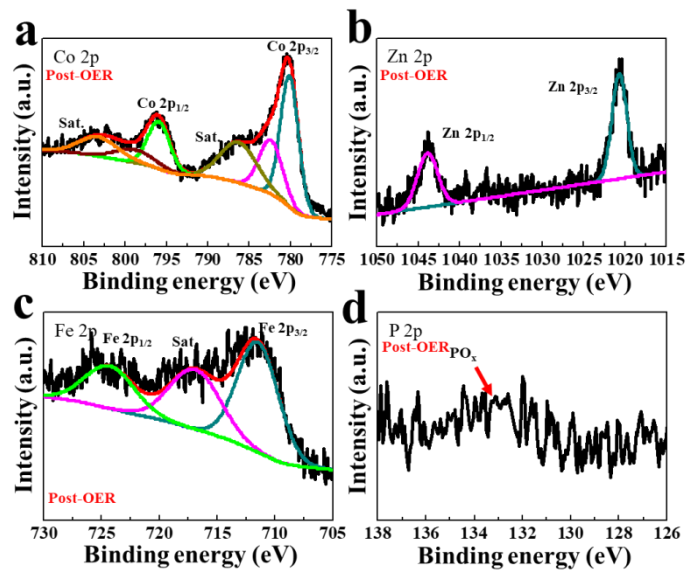

Fig. S20 XPS spectras of Fe/Zn-CoP after OER cycle.

**Table S2** Comparison of HER performances for Fe/Zn-CoP core-shell nanosheets with previously reported electrocatalysts in the alkaline media.

| Electrocatalyst                                | Substrate                             | Overpotential (mV)                              | Tafel slope (mV dec <sup>-1</sup> ) | Ref.                                                           |
|------------------------------------------------|---------------------------------------|-------------------------------------------------|-------------------------------------|----------------------------------------------------------------|
| Fe/Zn-CoP                                      | Carbon cloth                          | 75, 116, 132 at 10, 50, 100 mA cm <sup>-2</sup> | 57.9                                | <b>This work</b>                                               |
| Co <sub>5</sub> Mo <sub>1.0</sub> P nanosheets | Ni foam                               | 173, 300 at 10, 100 mA cm <sup>-2</sup>         | 190.1                               | <i>Nano Energy</i> 2018, <b>45</b> , 448                       |
| Ni <sub>2</sub> P nanosheets                   | Glassy carbon electrode               | 168 at 10 mA cm <sup>-2</sup>                   | 63                                  | <i>J. Mater. Chem. A</i> 2018, <b>6</b> , 18720-18727          |
| Al-Ni <sub>2</sub> P                           | Ti mesh                               | 129 at 10 mA cm <sup>-2</sup>                   | 129                                 | <i>Chem. Commun.</i> 2018, <b>54</b> , 2894-2897.              |
| CoP nanowire by oxygen plasma engraving        | Carbon cloth                          | 180 at 100 mA cm <sup>-2</sup>                  | 42.8                                | <i>Adv. Mater.</i> 2018, <b>30</b> , 1703322.                  |
| Co/CoP                                         | Glassy carbon rotating disk electrode | 340 at 10 mA cm <sup>-2</sup>                   | 79.5                                | <i>Adv. Energy Mater.</i> 2017, <b>7</b> , 1602355             |
| Ni-Co-P HNBS                                   | -                                     | 107 at 10 mA cm <sup>-2</sup>                   | 76                                  | <i>Energy Environ. Sci.</i> 2018, <b>11</b> , 872-880          |
| CoP/NCNHP                                      | Glassy carbon electrode               | 115 at 10 mA cm <sup>-2</sup>                   | 53                                  | <i>J. Am. Chem. Soc.</i> 2018, <b>140</b> , 2610-2618          |
| CoP <sub>3</sub> HSs                           | Carbon cloth                          | 116 at 10 mA cm <sup>-2</sup>                   | 82                                  | <i>Appl. Surf. Sci.</i> 2018, <b>427</b> , 800-806             |
| Multishelled Ni <sub>2</sub> P                 | Rotation disk electrode               | 98 at 10 mA cm <sup>-2</sup>                    | 86.4                                | <i>Chem. Mater.</i> 2017, <b>29</b> , 8539-8547                |
| CeO <sub>2</sub> -Cu <sub>3</sub> P            | Ni foam                               | 148 at 20 mA cm <sup>-2</sup>                   | 132                                 | <i>Nanoscale</i> 2018, <b>10</b> , 2213-2217                   |
| MoP/CNT                                        | Glass carbon disk                     | 114 at 10 mA cm <sup>-2</sup>                   | 51.6                                | <i>ACS Sustainable Chem. Eng.</i> 2018, <b>6</b> , 11414-11423 |
| Cu <sub>0.3</sub> Co <sub>2.7</sub> P/NC       | Glassy carbon electrode               | 220 at 10 mA cm <sup>-2</sup>                   | 122                                 | <i>Adv. Energy Mater.</i> 2017, <b>7</b> , 1601555             |

1. If not mentioned specifically, all overpotentials were corrected with iR compensation. 2. If not mentioned specifically, all electrocatalysts are directly synthesized on conductive substrates.

**Table S3** Comparison of OER performances for Fe/Zn-CoP core-shell nanosheets with previously reported electrocatalysts in the alkaline media.

| Electrocatalyst                                                                    | Substrate                             | Overpotential (mV)                               | Tafel slope (mV dec <sup>-1</sup> ) | Ref.                                                  |
|------------------------------------------------------------------------------------|---------------------------------------|--------------------------------------------------|-------------------------------------|-------------------------------------------------------|
| Fe/Zn-CoP                                                                          | Carbon cloth                          | 267, 302, 327 at 10, 50, 100 mA cm <sup>-2</sup> | 52.8                                | <b>This work</b>                                      |
| Fe <sub>1</sub> Co <sub>1</sub> -P/C                                               | Glassy carbon electrode               | 360 at 10 mA cm <sup>-2</sup>                    | -                                   | <i>Small Methods</i> 2018, <b>2</b> , 1800214         |
| CoP/NCNHP                                                                          | Glassy carbon electrode               | 305 at 10 mA cm <sup>-2</sup>                    | 70                                  | <i>J. Am. Chem. Soc.</i> 2018, <b>140</b> , 2610-2618 |
| Mo-CoP                                                                             | Carbon cloth                          | 310, 370 at 10, 100 mA cm <sup>-2</sup>          | 56                                  | <i>Nano Energy</i> 2018, <b>48</b> , 73–80            |
| H-CoP@NC                                                                           | Glassy carbon electrode               | 320 at 10 mA cm <sup>-2</sup>                    | 73                                  | <i>Inorg. Chem.</i> 2019, <b>58</b> , 14652-14659     |
| Co/CoP                                                                             | Glassy carbon rotating disk electrode | 340 at 10 mA cm <sup>-2</sup>                    | 79.5                                | <i>Adv. Energy Mater.</i> 2017, <b>7</b> , 1602355    |
| FeP-FeP <sub>x</sub> Py                                                            | Glassy carbon electrode               | 280 at 10 mA cm <sup>-2</sup>                    | 48                                  | <i>ACS Appl. Nano Mater.</i> 2018, <b>1</b> , 617-624 |
| Multishelled Ni <sub>2</sub> P                                                     | Rotation disk electrode               | 270 at 10 mA cm <sup>-2</sup>                    | 40.4                                | <i>Chem. Mater.</i> 2017, <b>29</b> , 8539-8547       |
| Ni <sub>2</sub> P nanosheets                                                       | Glassy carbon electrode               | 320 at 10 mA cm <sup>-2</sup>                    | 105                                 | <i>J. Mater. Chem. A</i> 2018, <b>6</b> , 18720-18727 |
| Co <sub>3</sub> O <sub>4</sub> /NiCo <sub>2</sub> O <sub>4</sub> DSNC <sub>s</sub> | Ni foam                               | 340 at 10 mA cm <sup>-2</sup>                    | 88                                  | <i>J. Am. Chem. Soc.</i> 2015, <b>137</b> , 5590      |
| CoP-Fe <sub>2</sub> O <sub>3</sub>                                                 | ITO substrate                         | 302 at 10 mA cm <sup>-2</sup>                    | -                                   | <i>J. Mater. Chem. A</i> 2018, <b>6</b> , 4783-4792   |
| CoP/rGO-400                                                                        | Glass carbon electrode                | 340 at 10 mA cm <sup>-2</sup>                    | 66                                  | <i>Chem. Sci.</i> 2016, <b>7</b> , 1690               |
| Ni-Co-P                                                                            | Glass carbon electrode                | 300 at 10 mA cm <sup>-2</sup>                    | 80                                  | <i>Adv. Funct. Mater.</i> 2018, <b>28</b> , 1706008   |

1. If not mentioned specifically, all overpotentials were corrected with iR compensation. 2. If not mentioned specifically, all electrocatalysts are directly synthesized on conductive substrates.

**Table S4** Comparison of all water-splitting performances for Fe/Zn-CoP core-shell nanosheets with previously reported electrocatalysts in the alkaline media.

| Electrocatalyst                          | Substrate               | Voltage                                            | Ref.                                                  |
|------------------------------------------|-------------------------|----------------------------------------------------|-------------------------------------------------------|
| Fe/Zn-CoP                                | Carbon cloth            | 1.59, 1.62, 1.65 at 10, 20, 50 mA cm <sup>-2</sup> | <b>This work</b>                                      |
| CoP/NCNHP                                | Glassy carbon electrode | 1.64 at 10 mA cm <sup>-2</sup>                     | <i>J. Am. Chem. Soc.</i> 2018, <b>140</b> , 2610-2618 |
| Ni-Co-P HNBs                             | -                       | 1.62 V at 10 mA cm <sup>-2</sup>                   | <i>Energy Environ. Sci.</i> 2018, <b>11</b> , 872-880 |
| Cu <sub>0.3</sub> Co <sub>2.7</sub> P/NC | Glassy carbon electrode | 1.74 at 70 mA cm <sup>-2</sup>                     | <i>Adv. Energy Mater.</i> 2017, <b>7</b> , 1601555    |
| H-Co <sub>0.85</sub> Se P                | exfoliated graphene     | 1.64 V at 10 mA cm <sup>-2</sup>                   | <i>Adv. Mater.</i> 2017, <b>29</b> , 1701589          |
| Fe-CoP                                   | Ti foam                 | 1.60 V at 10 mA cm <sup>-2</sup>                   | <i>Adv. Mater.</i> 2017, <b>29</b> , 1602441          |
| CoP-Fe <sub>2</sub> O <sub>3</sub>       | ITO substrate           | 1.67 V at 100 mA cm <sup>-2</sup>                  | <i>J. Mater. Chem. A</i> 2018, <b>6</b> , 4783-4792   |
| CoO <sub>x</sub> -CoSe film              | Ni foam                 | 1.66 V at 10 mA cm <sup>-2</sup>                   | <i>J. Mater. Chem. A</i> 2016, <b>4</b> , 10933       |
| H-CoP@NC                                 | Glassy carbon electrode | 1.72 V at 10 mA cm <sup>-2</sup>                   | <i>Inorg. Chem.</i> 2019, <b>58</b> , 14652-14659     |

1. If not mentioned specifically, all overpotentials were corrected with iR compensation. 2. If not mentioned specifically, all electrocatalysts are directly synthesized on conductive substrates.

## Reference

- [1] T. Liu, W. Wang, M. Yi, Q. Chen, C. Xu, D. Cai, H. Zhan, *Chem. Eng. J.* 354 (2018) 454-462.
- [2] Z. Peng, D. Jia, A. M. Al-Enizi, A. A. Elzatahry, G. Zheng, *Adv. Energy Mater.* 5 (2015) 1402031.
- [3] C. C. Mccrory, S. Jung, J. C. Peters and T. F. Jaramillo, *J. Am. Chem. Soc.* 135 (2013) 16977-16987.
- [4] D. Voiry, M. Chhowalla, Y. Gogotsi, N. Kotov, Y. Li, R. Penner, R. Schaak, P. Weiss, *ACS Nano* 12 (2018) 9635-9638.
- [5] T. Liu, P. Li, N. Yao, G. Cheng, S. Chen, W. Luo, Y. Yin, *Angew. Chem. Int. Ed.* 58 (2019) 4679-4684.
